# Supplementary material for: Platinum(ii) complexes with hybrid amine-imidazolin-2-imine ligands and their reactivity toward bio-molecules
Source: Royal Society of Chemistry journal article supplement (doi:10.1039/c5nj03360h), 2016-01-01
Supplement: c5nj03360h1.pdf [file c5nj03360h1.pdf]

## New Journal of Chemistry

### **Platinum(II) complexes with hybrid amine-imidazolin-2-imine ligands and their reactivity toward bio-molecules**

Jovana Bogojeski,<sup>a\*</sup> Jeroen Volbeda,<sup>b</sup> Živadin D. Bugarčić,<sup>a</sup> Matthias Freytag<sup>b</sup> and

Matthias Tamm<sup>b</sup>

<sup>a</sup> *Department of Chemistry, Faculty of Science, University of Kragujevac, R. Domanovića 12, P. O. Box 60, 34000 Kragujevac, Serbia*

<sup>b</sup> *Institut für Anorganische und Analytische Chemie, Technische Universität Braunschweig, Hagenring 30, 38106 Braunschweig, Germany*

**[(DACH(Im<sup>i</sup>PrH)<sub>2</sub>)(AuCl<sub>2</sub>)<sub>2</sub>]:**

<sup>1</sup>H NMR (300 MHz; CDCl<sub>3</sub>): δ = 5.65 (bs, 2H, NH), 4.98 (sept, 4H, J<sub>HH</sub> 7.0 Hz, CHMe<sub>2</sub>), 3.40 (bs, 2H, CH<sub>2</sub>CH(NH)CH(NH)CH<sub>2</sub>), 2.22 (s, 12H, CCH<sub>3</sub>), 1.79 - 1.60 (m, 6H, CH<sub>2</sub>), 1.60 (d, 12H, J<sub>HH</sub> 7.0 Hz, CH(CH<sub>3</sub>)<sub>2</sub>), 1.52 (d, 12H, J<sub>HH</sub> 7.0 Hz, CH(CH<sub>3</sub>)<sub>2</sub>), 1.23 - 1.18 (m, 2H, CH<sub>2</sub>) ppm.

<sup>13</sup>C NMR (100 MHz; CDCl<sub>3</sub>): δ = 147.5 (N<sub>2</sub>CNH), 124.3 (CMe), 63.4 (CH<sub>2</sub>CH(NHC)CH(NHC)CH<sub>2</sub>), 50.4 (CHMe<sub>2</sub>), 35.6 (CH<sub>2</sub>), 25.5 (CH<sub>2</sub>), 22.6 (CH(CH<sub>3</sub>)<sub>2</sub>), 20.8 (CH(CH<sub>3</sub>)<sub>2</sub>), 11.7 (CCH<sub>3</sub>) ppm.

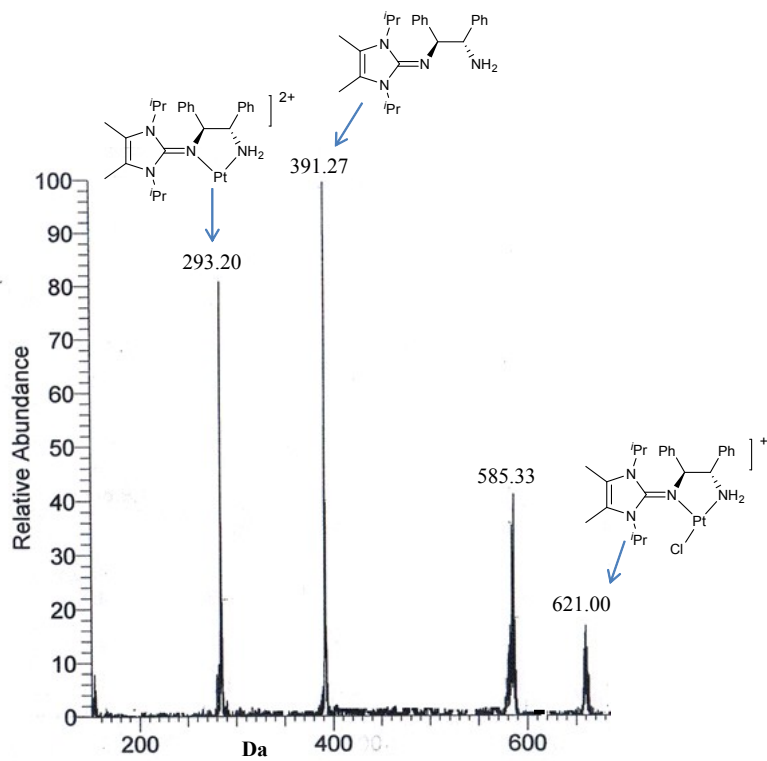

**Figure S1.** Mass spectrum of the [Pt(DPENIm<sup>iPr</sup>)Cl<sub>2</sub>] complex.

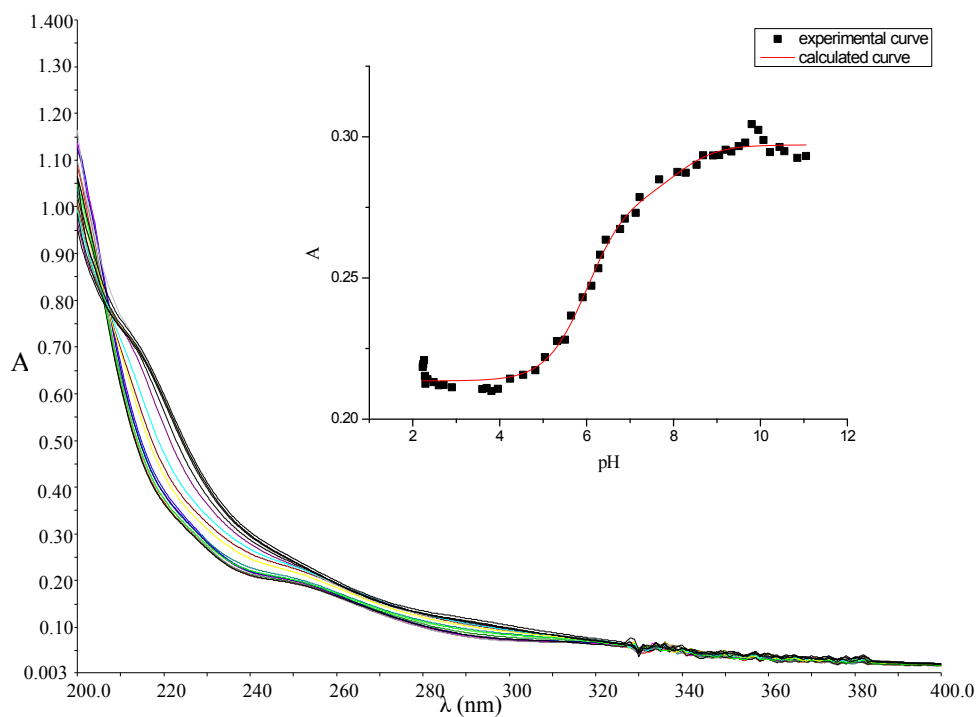

**Figure S2.** UV-vis spectra recorded for 0.1 mM  $[\text{Pt}(\text{DPENIm}^{i\text{Pr}})(\text{H}_2\text{O})_2]^{2+}$  in the pH range 2 to 12 at 25 °C. Insert: Plot of absorbance vs pH at 262 nm.

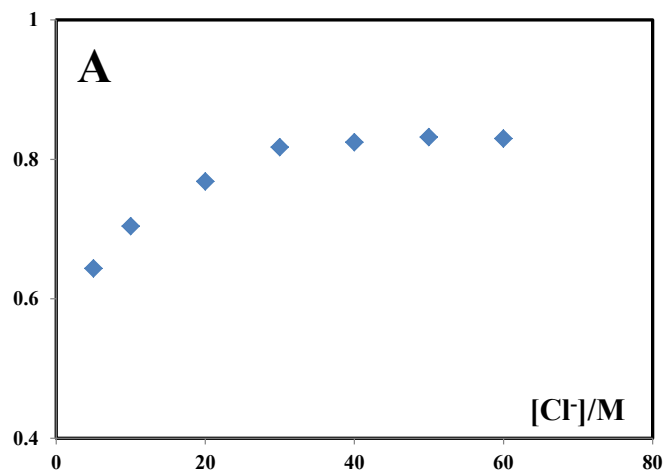

**Figure S3.** The effect of different concentrations of chloride ions on the change in absorbance in the solution of the complex  $[\text{Pt}(\text{DPENIm}^{i\text{Pr}})\text{Cl}_2]$  in 25 mM Hepes buffer ( $\text{pH} \approx 7,2$ ) at 245 nm.

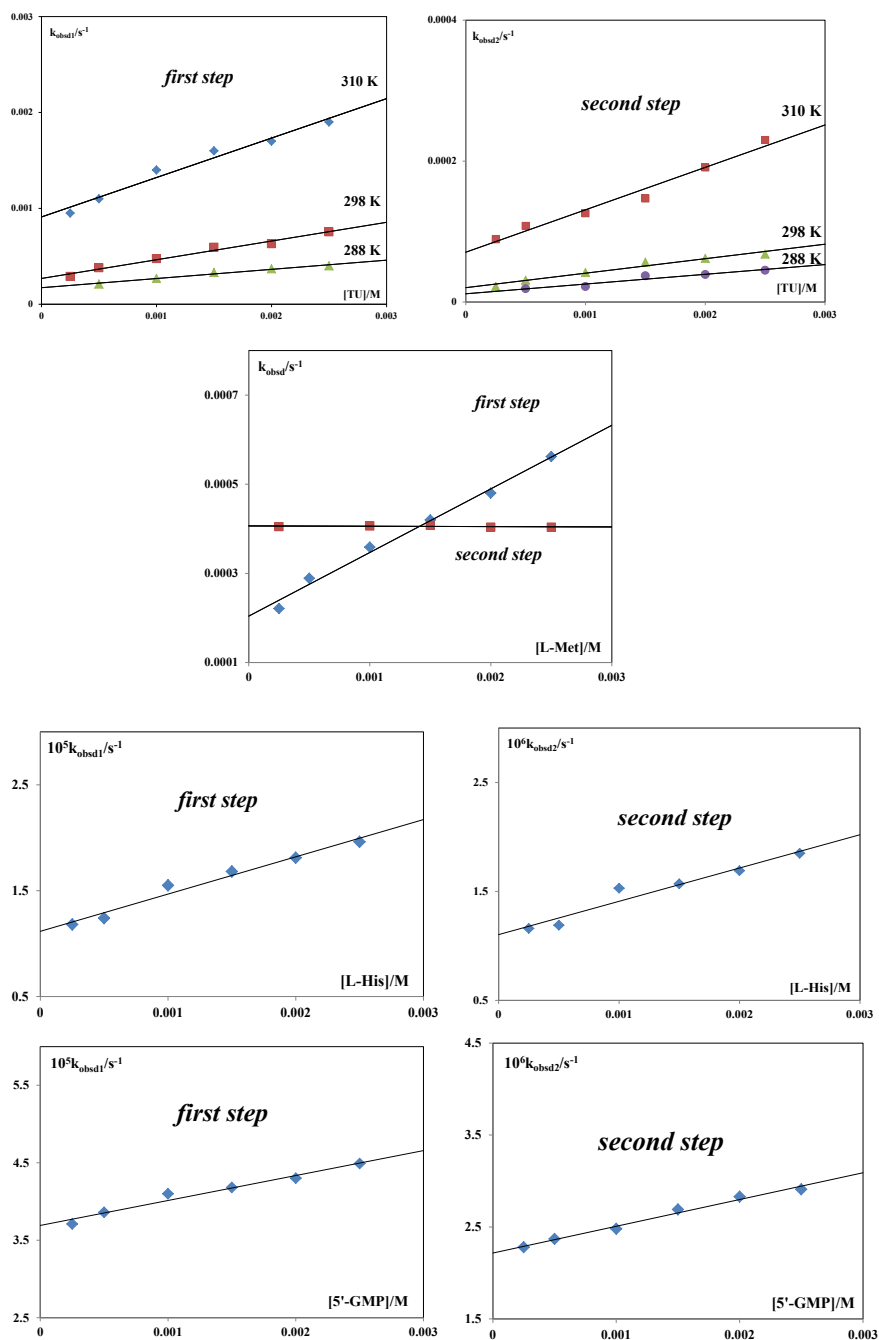

**Figure S4.** Pseudo-first-order rate constants plotted as a function of nucleophile concentration for the first and second step of the substitution reactions of the  $[\text{Pt}(\text{DMEAIM}^{i\text{Pr}})\text{Cl}_2]$  complexes with TU, L-Met, L-His and 5'-GMP at pH = 7.2 and 310 K in 25 mM Hepes buffer and 30 mM NaCl.

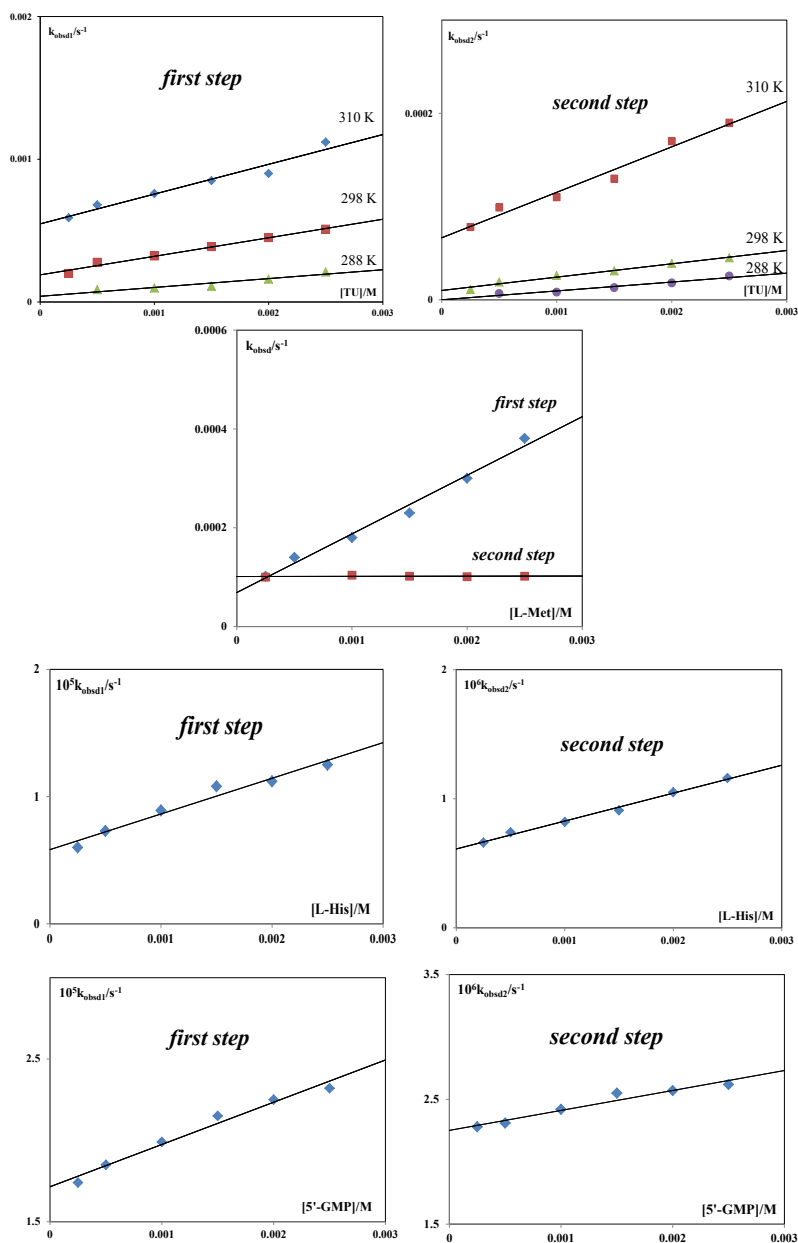

**Figure S5.** *Pseudo*-first-order rate constants plotted as a function of nucleophile concentration for the first and second step of the substitution reactions of the  $[\text{Pt}(\text{DPENIm}^{i\text{Pr}})\text{Cl}_2]$  complexes with TU, L-Met, L-His and 5'-GMP at pH = 7.2 and 310 K in 25 mM Hepes buffer and 30 mM NaCl.

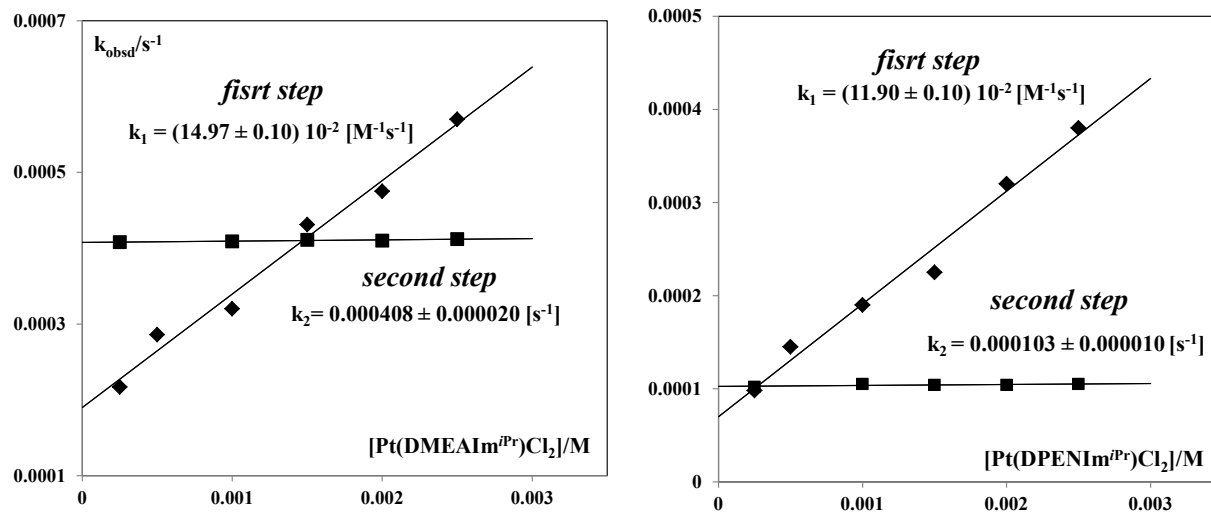

**Figure S6.** Pseudo-first-order rate constants plotted as a function of complex concentration for the first and second step of the substitution reactions of the  $[\text{Pt}(\text{DMEAImp}^{i\text{Pr}})\text{Cl}_2]$  and  $[\text{Pt}(\text{DPENImp}^{i\text{Pr}})\text{Cl}_2]$  complexes with L-Met at  $\text{pH} = 7.2$  and 310 K in 25 mM HEPES buffer and 30 mM NaCl.



**Table S1.** Activation parameters for the first and the second reaction steps between investigated Pt(II) complexes and TU at pH = 7.2, 25 mM Hepes buffer and 30 mM NaCl.

|                                                      | <i>first step</i>                                |                                                                | <i>second step</i>                               |                                                                |
|------------------------------------------------------|--------------------------------------------------|----------------------------------------------------------------|--------------------------------------------------|----------------------------------------------------------------|
|                                                      | $\Delta H_1^\ddagger$<br>[kJ mol <sup>-1</sup> ] | $\Delta S_1^\ddagger$<br>[JK <sup>-1</sup> mol <sup>-1</sup> ] | $\Delta H_2^\ddagger$<br>[kJ mol <sup>-1</sup> ] | $\Delta S_2^\ddagger$<br>[JK <sup>-1</sup> mol <sup>-1</sup> ] |
| [Pt(DMEAI <i>m</i> <sup>iPr</sup> )Cl <sub>2</sub> ] | 47 ± 1                                           | -115 ± 4                                                       | 47 ± 1                                           | -131 ± 4                                                       |
| [Pt(DPENIm <sup>iPr</sup> )Cl <sub>2</sub> ]         | 38 ± 6                                           | -149 ± 18                                                      | 53 ± 1                                           | -115 ± 5                                                       |

**Table S2.** Observed *pseudo*-first order rate constants as a function of nucleophile concentration and temperature for the first and second reaction step between complex [Pt(DMEAI<sup>iPr</sup>)Cl<sub>2</sub>] and TU at pH = 7.2 (25 mM Hepes buffer) in the presence of 30 mM NaCl at 310, 298 and 288 K.

| T(K)  | C <sub>TU</sub> /M | first step<br>k <sub>obsd1</sub> /s <sup>-1</sup> | second step<br>k <sub>obsd2</sub> /s <sup>-1</sup> |
|-------|--------------------|---------------------------------------------------|----------------------------------------------------|
| 288.0 | 0.0025             | 0.00040(3)                                        | 0.000045(3)                                        |
|       | 0.0020             | 0.00037(3)                                        | 0.000039(3)                                        |
|       | 0.0015             | 0.00033(3)                                        | 0.000037(3)                                        |
|       | 0.0010             | 0.00027(3)                                        | 0.000022(3)                                        |
|       | 0.0005             | 0.00021(3)                                        | 0.000019(3)                                        |
|       | 0.0002             | /                                                 | /                                                  |
| 298.0 | 0.0025             | 0.00075(2)                                        | 0.000068(2)                                        |
|       | 0.0020             | 0.00063(3)                                        | 0.000062(3)                                        |
|       | 0.0015             | 0.00059(3)                                        | 0.000057(3)                                        |
|       | 0.0010             | 0.00047(3)                                        | 0.000042(3)                                        |
|       | 0.0005             | 0.00038(3)                                        | 0.000031(3)                                        |
|       | 0.0002             | 0.00029(4)                                        | 0.000022(3)                                        |
| 310.0 | 0.0025             | 0.0019(4)                                         | 0.00023(4)                                         |
|       | 0.0020             | 0.0017(3)                                         | 0.00019(3)                                         |
|       | 0.0015             | 0.0016(3)                                         | 0.00015(3)                                         |
|       | 0.0010             | 0.0014(3)                                         | 0.00013(3)                                         |
|       | 0.0005             | 0.0011(4)                                         | 0.00011(4)                                         |
|       | 0.0002             | 0.0009(4)                                         | 0.00009(4)                                         |

**Table S3.** Observed *pseudo*-first order rate constants as a function of nucleophile concentration and temperature for the reaction between complex [Pt(DMEAIm<sup>iPr</sup>)Cl<sub>2</sub>] and L-Met at pH = 7.2 (25 mM Hepes buffer) in the presence of 30 mM NaCl at 310 K.

| T(K)  | C <sub>L-Met</sub> /M | first step<br>k <sub>obsd1</sub> /s <sup>-1</sup> | second step<br>k <sub>obsd2</sub> /s <sup>-1</sup> |
|-------|-----------------------|---------------------------------------------------|----------------------------------------------------|
| 310.0 | 0.0025                | 0.00056(3)                                        | 0.000404(3)                                        |
|       | 0.0020                | 0.00048(3)                                        | 0.000404(3)                                        |
|       | 0.0015                | 0.00042(3)                                        | 0.000408(3)                                        |
|       | 0.0010                | 0.00036(3)                                        | 0.000406(3)                                        |
|       | 0.0005                | 0.00029(3)                                        | /                                                  |
|       | 0.0002                | 0.00022(3)                                        | 0.000405(3)                                        |

**Table S4.** Observed *pseudo*-first order rate constants as a function of nucleophile concentration and temperature for the reaction between complex [Pt(DMEAIm<sup>iPr</sup>)Cl<sub>2</sub>] and L-His at pH = 7.2 (25 mM Hepes buffer) in the presence of 30 mM NaCl at 310 K.

| T(K)  | C <sub>L-His</sub> /M | first step<br>10 <sup>5</sup> k <sub>obsd1</sub> /s <sup>-1</sup> | second step<br>10 <sup>6</sup> k <sub>obsd2</sub> /s <sup>-1</sup> |
|-------|-----------------------|-------------------------------------------------------------------|--------------------------------------------------------------------|
| 310.0 | 0.0025                | 1.96(2)                                                           | 1.85(3)                                                            |
|       | 0.0020                | 1.81(3)                                                           | 1.69(3)                                                            |
|       | 0.0015                | 1.68(3)                                                           | 1.57(3)                                                            |
|       | 0.0010                | 1.55(3)                                                           | 1.53(3)                                                            |
|       | 0.0005                | 1.24(4)                                                           | 1.19(3)                                                            |
|       | 0.0002                | 1.18(3)                                                           | 1.16(3)                                                            |

**Table S5.** Observed *pseudo*-first order rate constants as a function of nucleophile concentration and temperature for the reaction between complex [Pt(DMEAI<sup>i</sup>Pr)Cl<sub>2</sub>] and 5'-GMP at pH = 7.2 (25 mM Hepes buffer) in the presence of 30 mM NaCl at 310 K.

| T(K)  | C <sub>5'-GMP</sub> /M | first step<br>10 <sup>5</sup> k <sub>obsd1</sub> /s <sup>-1</sup> | second step<br>10 <sup>6</sup> k <sub>obsd2</sub> /s <sup>-1</sup> |
|-------|------------------------|-------------------------------------------------------------------|--------------------------------------------------------------------|
| 310.0 | 0.0025                 | 4.49(4)                                                           | 2.91(3)                                                            |
|       | 0.0020                 | 4.30(3)                                                           | 2.83(3)                                                            |
|       | 0.0015                 | 4.18(3)                                                           | 2.69(3)                                                            |
|       | 0.0010                 | 4.10(3)                                                           | 2.48(3)                                                            |
|       | 0.0005                 | 3.86(3)                                                           | 2.37(3)                                                            |
|       | 0.0002                 | 3.71(3)                                                           | 2.28(3)                                                            |

**Table S6.** Observed *pseudo*-first order rate constants as a function of nucleophile concentration and temperature for the first and second reaction step between complex [Pt(DPENIm<sup>iPr</sup>)Cl<sub>2</sub>] and TU at pH = 7.2 (25 mM Hepes buffer) in the presence of 30 mM NaCl at 310, 298 and 288 K.

| T(K)  | C <sub>TU</sub> /M | first step<br>k <sub>obsd1</sub> /s <sup>-1</sup> | second step<br>k <sub>obsd2</sub> /s <sup>-1</sup> |
|-------|--------------------|---------------------------------------------------|----------------------------------------------------|
| 288.0 | 0.0025             | 0.00021(3)                                        | 0.000025(3)                                        |
|       | 0.0020             | 0.00016(3)                                        | 0.000018(3)                                        |
|       | 0.0015             | 0.00011(3)                                        | 0.000013(3)                                        |
|       | 0.0010             | 0.00009(3)                                        | 0.000008(3)                                        |
|       | 0.0005             | 0.00008(3)                                        | 0.000007(3)                                        |
|       | 0.0002             | /                                                 | /                                                  |
| 298.0 | 0.0025             | 0.00051(3)                                        | 0.000045(3)                                        |
|       | 0.0020             | 0.00045(3)                                        | 0.000039(3)                                        |
|       | 0.0015             | 0.00039(3)                                        | 0.000031(3)                                        |
|       | 0.0010             | 0.00032(3)                                        | 0.000026(3)                                        |
|       | 0.0005             | 0.00028(3)                                        | 0.000019(3)                                        |
|       | 0.0002             | 0.00020(4)                                        | 0.000011(4)                                        |
| 310.0 | 0.0025             | 0.00112(4)                                        | 0.00019(4)                                         |
|       | 0.0020             | 0.00090(3)                                        | 0.00017(3)                                         |
|       | 0.0015             | 0.00085(3)                                        | 0.00013(3)                                         |
|       | 0.0010             | 0.00076(3)                                        | 0.00011(3)                                         |
|       | 0.0005             | 0.00068(4)                                        | 0.00009(4)                                         |
|       | 0.0002             | 0.00059(4)                                        | 0.00008(4)                                         |

**Table S7.** Observed *pseudo*-first order rate constants as a function of nucleophile concentration and temperature for the reaction between complex [Pt(DPENIm<sup>iPr</sup>)Cl<sub>2</sub>] and L-Met at pH = 7.2 (25 mM Hepes buffer) in the presence of 30 mM NaCl at 310 K.

| T(K)  | C <sub>L-Met</sub> /M | first step<br>k <sub>obsd1</sub> /s <sup>-1</sup> | second step<br>k <sub>obsd2</sub> /s <sup>-1</sup> |
|-------|-----------------------|---------------------------------------------------|----------------------------------------------------|
| 310.0 | 0.0025                | 0.00038(3)                                        | 0.000102(3)                                        |
|       | 0.0020                | 0.00030(3)                                        | 0.000101(3)                                        |
|       | 0.0015                | 0.00023(3)                                        | 0.000102(3)                                        |
|       | 0.0010                | 0.00018(4)                                        | 0.000104(3)                                        |
|       | 0.0005                | 0.00014(3)                                        | /                                                  |
|       | 0.0002                | 0.00010(3)                                        | 0.000100(3)                                        |

**Table S8.** Observed *pseudo*-first order rate constants as a function of nucleophile concentration and temperature for the reaction between complex [Pt(DPENIm<sup>iPr</sup>)Cl<sub>2</sub>] and L-His at pH = 7.2 (25 mM Hepes buffer) in the presence of 30 mM NaCl at 310 K.

| T(K)  | C <sub>L-His</sub> /M | first step<br>10 <sup>5</sup> k <sub>obsd</sub> /s <sup>-1</sup> | second step<br>10 <sup>6</sup> k <sub>obsd</sub> /s <sup>-1</sup> |
|-------|-----------------------|------------------------------------------------------------------|-------------------------------------------------------------------|
| 310.0 | 0.0025                | 1.25(4)                                                          | 1.16(3)                                                           |
|       | 0.0020                | 1.12(3)                                                          | 1.05(3)                                                           |
|       | 0.0015                | 1.08(3)                                                          | 0.91(3)                                                           |
|       | 0.0010                | 0.89(3)                                                          | 0.82(3)                                                           |
|       | 0.0005                | 0.73(3)                                                          | 0.74(3)                                                           |
|       | 0.0002                | 0.60(3)                                                          | 0.66(3)                                                           |

**Table S9.** Observed *pseudo*-first order rate constants as a function of nucleophile concentration and temperature for the reaction between complex [Pd(DPENIm<sup>iPr</sup>)Cl<sub>2</sub>] and 5'-GMP at pH = 7.2 (25 mM HEPES buffer) in the presence of 30 mM NaCl at 310 K.

| T(K)  | C <sub>Gly</sub> /M | first step<br>10 <sup>5</sup> k <sub>obsd1</sub> /s <sup>-1</sup> | second step<br>10 <sup>6</sup> k <sub>obsd2</sub> /s <sup>-1</sup> |
|-------|---------------------|-------------------------------------------------------------------|--------------------------------------------------------------------|
| 310.0 | 0.0025              | 2.32(3)                                                           | 2.62(6)                                                            |
|       | 0.0020              | 2.25(4)                                                           | 2.57(6)                                                            |
|       | 0.0015              | 2.15(3)                                                           | 2.55(6)                                                            |
|       | 0.0010              | 1.99(3)                                                           | 2.42(6)                                                            |
|       | 0.0005              | 1.85(3)                                                           | 2.31(6)                                                            |
|       | 0.0002              | 1.74(3)                                                           | 2.28(6)                                                            |

**Table S10.** The rate constants for the back reactions of the first and the second reaction step of the substitution reactions of the Pt(II) complexes with TU, L-Met, L-His and 5'-GMP at pH = 7.2 (25 mM Hepes buffer) in the presence of 30 mM NaCl at 310 K.

|        | <b>[Pt(DMEAI<i>m</i><sup>iPr</sup>)Cl<sub>2</sub>]</b>                                    |                                                                                            | <b>[Pt(DPENIm<sup>iPr</sup>)Cl<sub>2</sub>]</b>                                           |                                                                                            |
|--------|-------------------------------------------------------------------------------------------|--------------------------------------------------------------------------------------------|-------------------------------------------------------------------------------------------|--------------------------------------------------------------------------------------------|
|        | <b>first step</b><br>k <sub>-1</sub> [Cl <sup>-</sup> ][M <sup>-1</sup> s <sup>-1</sup> ] | <b>second step</b><br>k <sub>-2</sub> [Cl <sup>-</sup> ][M <sup>-1</sup> s <sup>-1</sup> ] | <b>first step</b><br>k <sub>-1</sub> [Cl <sup>-</sup> ][M <sup>-1</sup> s <sup>-1</sup> ] | <b>second step</b><br>k <sub>-2</sub> [Cl <sup>-</sup> ][M <sup>-1</sup> s <sup>-1</sup> ] |
| TU     | (9.0 ± 0.2) 10 <sup>-4</sup>                                                              | (7.0 ± 0.2) 10 <sup>-5</sup>                                                               | (6.7 ± 0.2) 10 <sup>-4</sup>                                                              | (6.7 ± 0.2) 10 <sup>-5</sup>                                                               |
| L-Met  | (2.0 ± 0.1) 10 <sup>-4</sup>                                                              | /                                                                                          | (6.9 ± 0.2) 10 <sup>-5</sup>                                                              | /                                                                                          |
| L-His  | (1.0 ± 0.1) 10 <sup>-5</sup>                                                              | (1.1 ± 0.1) 10 <sup>-6</sup>                                                               | (5.8 ± 0.1) 10 <sup>-5</sup>                                                              | (6.1 ± 0.1) 10 <sup>-6</sup>                                                               |
| 5'-GMP | (3.7 ± 0.2) 10 <sup>-5</sup>                                                              | (2.2 ± 0.1) 10 <sup>-6</sup>                                                               | (1.7 ± 0.2) 10 <sup>-5</sup>                                                              | (2.3 ± 0.1) 10 <sup>-6</sup>                                                               |
